# Supplementary material
Source: ML conference proceedings conference paper supplement (https://openreview.net/forum?id=Gvh6sU0uUt)

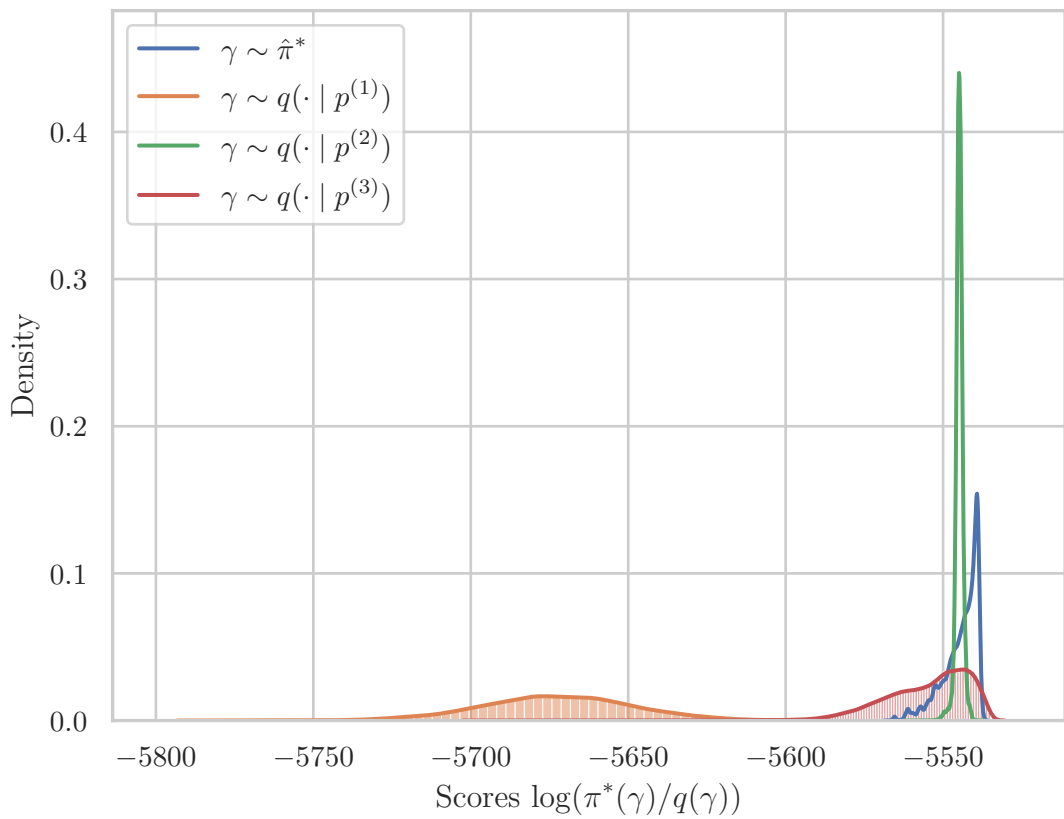

Supplement: supplementary_material [file histo_loss_kde.pdf › LSVI_NIPS/LSVI/experiments/bayesianSelectionVariable/concrete/output/histo_loss_kde.pdf]

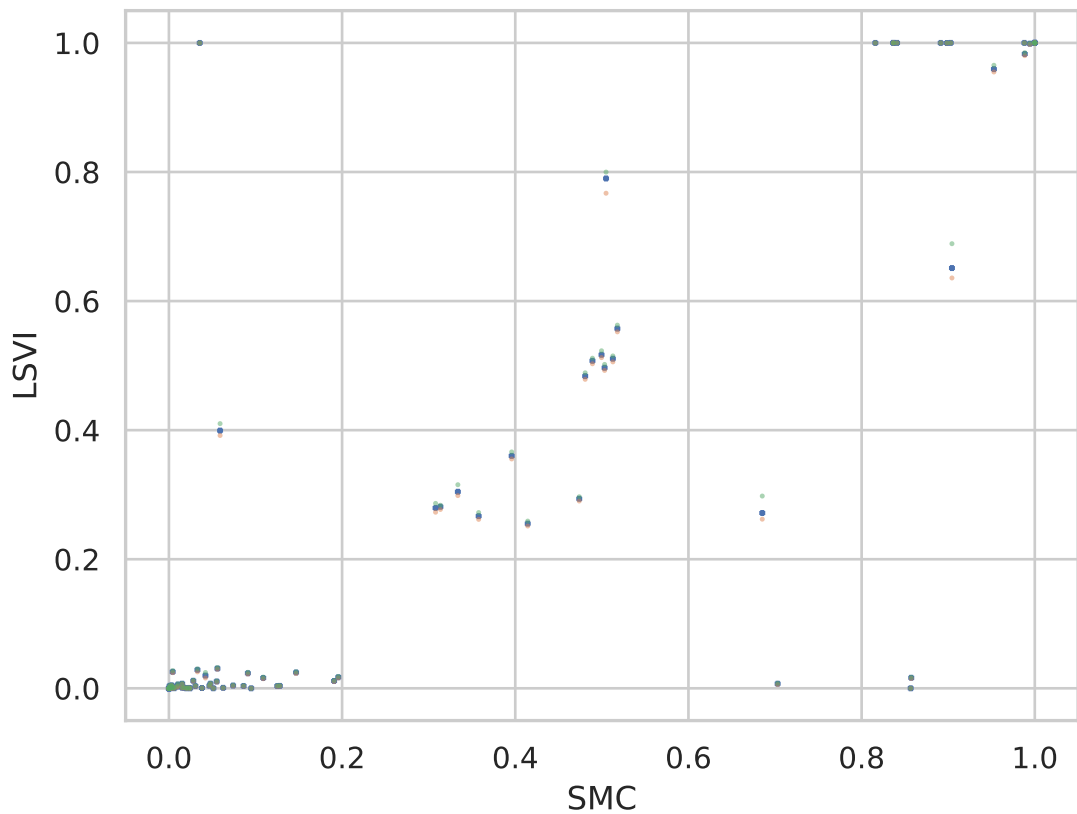

Supplement: supplementary_material [file scatter_plot.pdf › LSVI_NIPS/LSVI/experiments/bayesianSelectionVariable/concrete/output/scatter_plot.pdf]

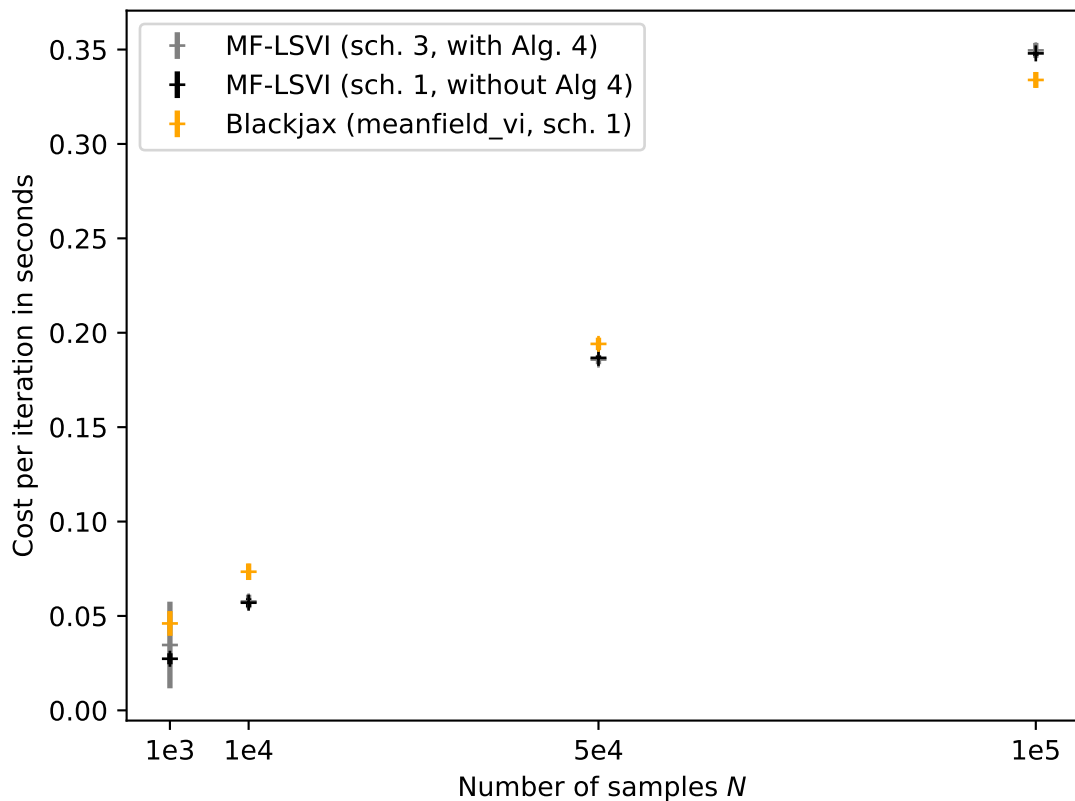

Supplement: supplementary_material [file cost_per_iteration_mean_field_mnist.pdf › LSVI_NIPS/LSVI/experiments/logisticRegression/mnist/cost_per_iteration_mean_field_mnist.pdf]

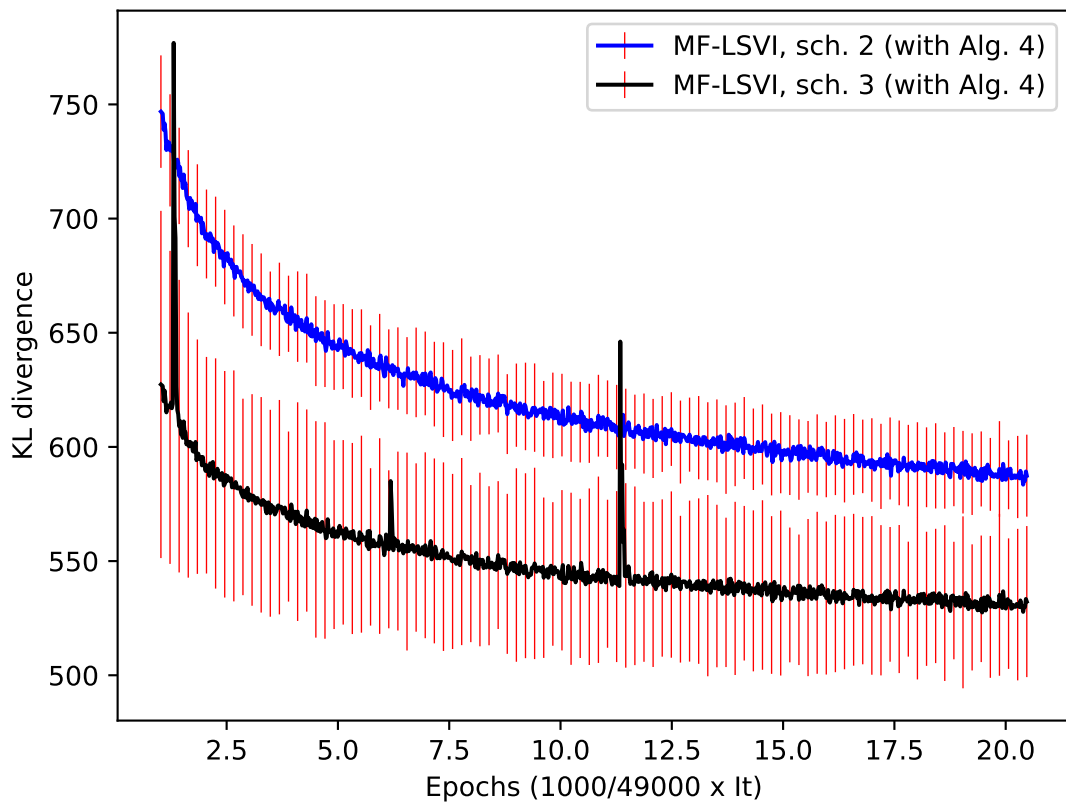

Supplement: supplementary_material [file mean_std_subsampling_mfg_starting_from_50 (2).pdf › LSVI_NIPS/LSVI/experiments/logisticRegression/subsampling_review/output_mean_field/mean_std_subsampling_mfg_starting_from_50 (2).pdf]

Scaled parameters

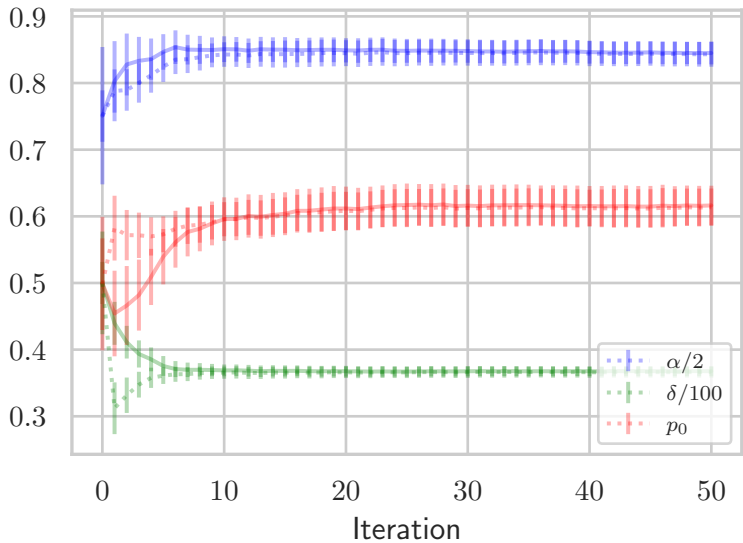

Supplement: supplementary_material [file comparison.pdf › LSVI_NIPS/LSVI/experiments/syntheticLikelihood/output/comparison.pdf]

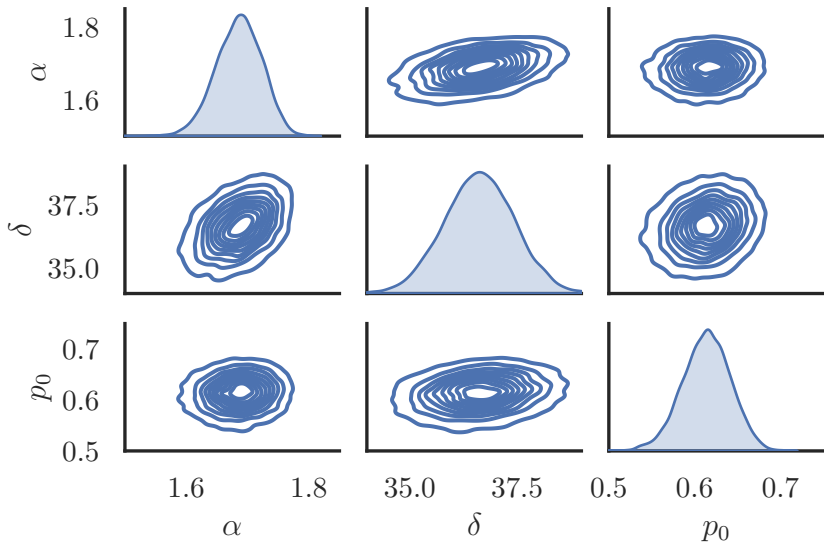

Supplement: supplementary_material [file pairplot_bsl_fcg_0.pdf › LSVI_NIPS/LSVI/experiments/syntheticLikelihood/output/pairplot_bsl_fcg_0.pdf]

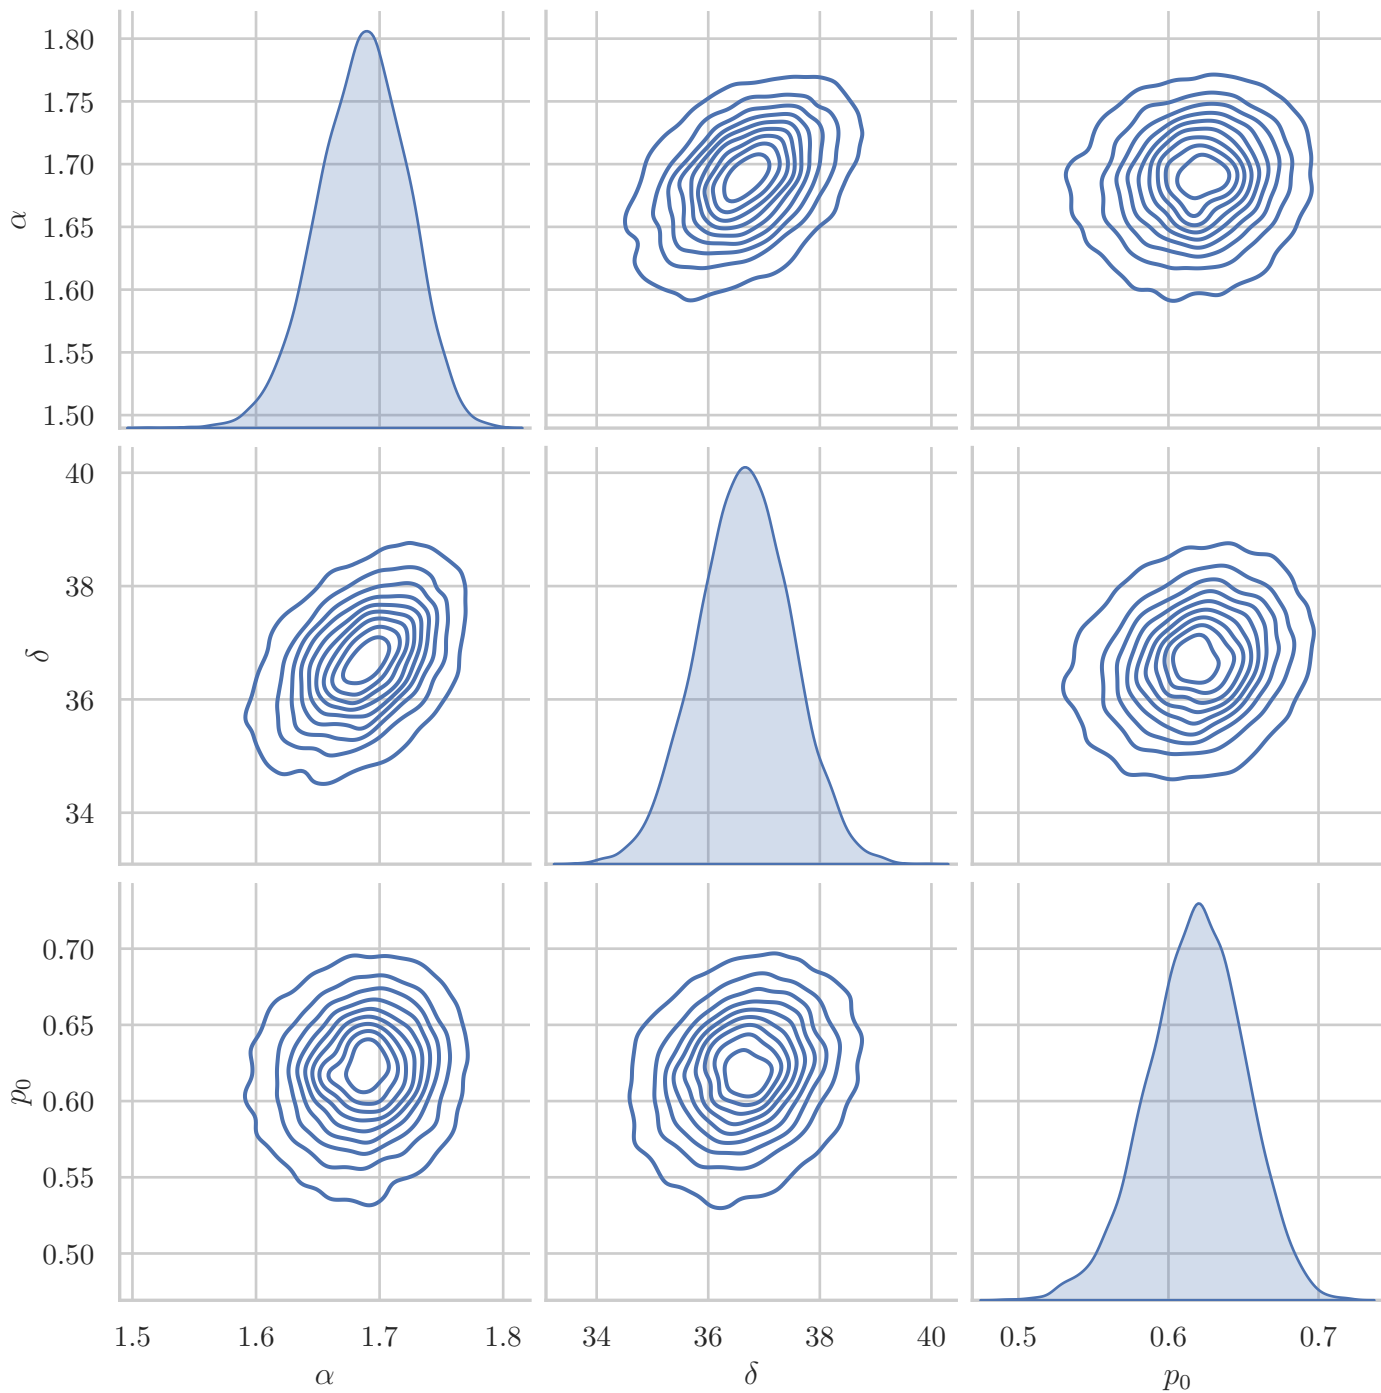

Supplement: supplementary_material [file pairplot_bsl_fcg_12.pdf › LSVI_NIPS/LSVI/experiments/syntheticLikelihood/output/pairplot_bsl_fcg_12.pdf]

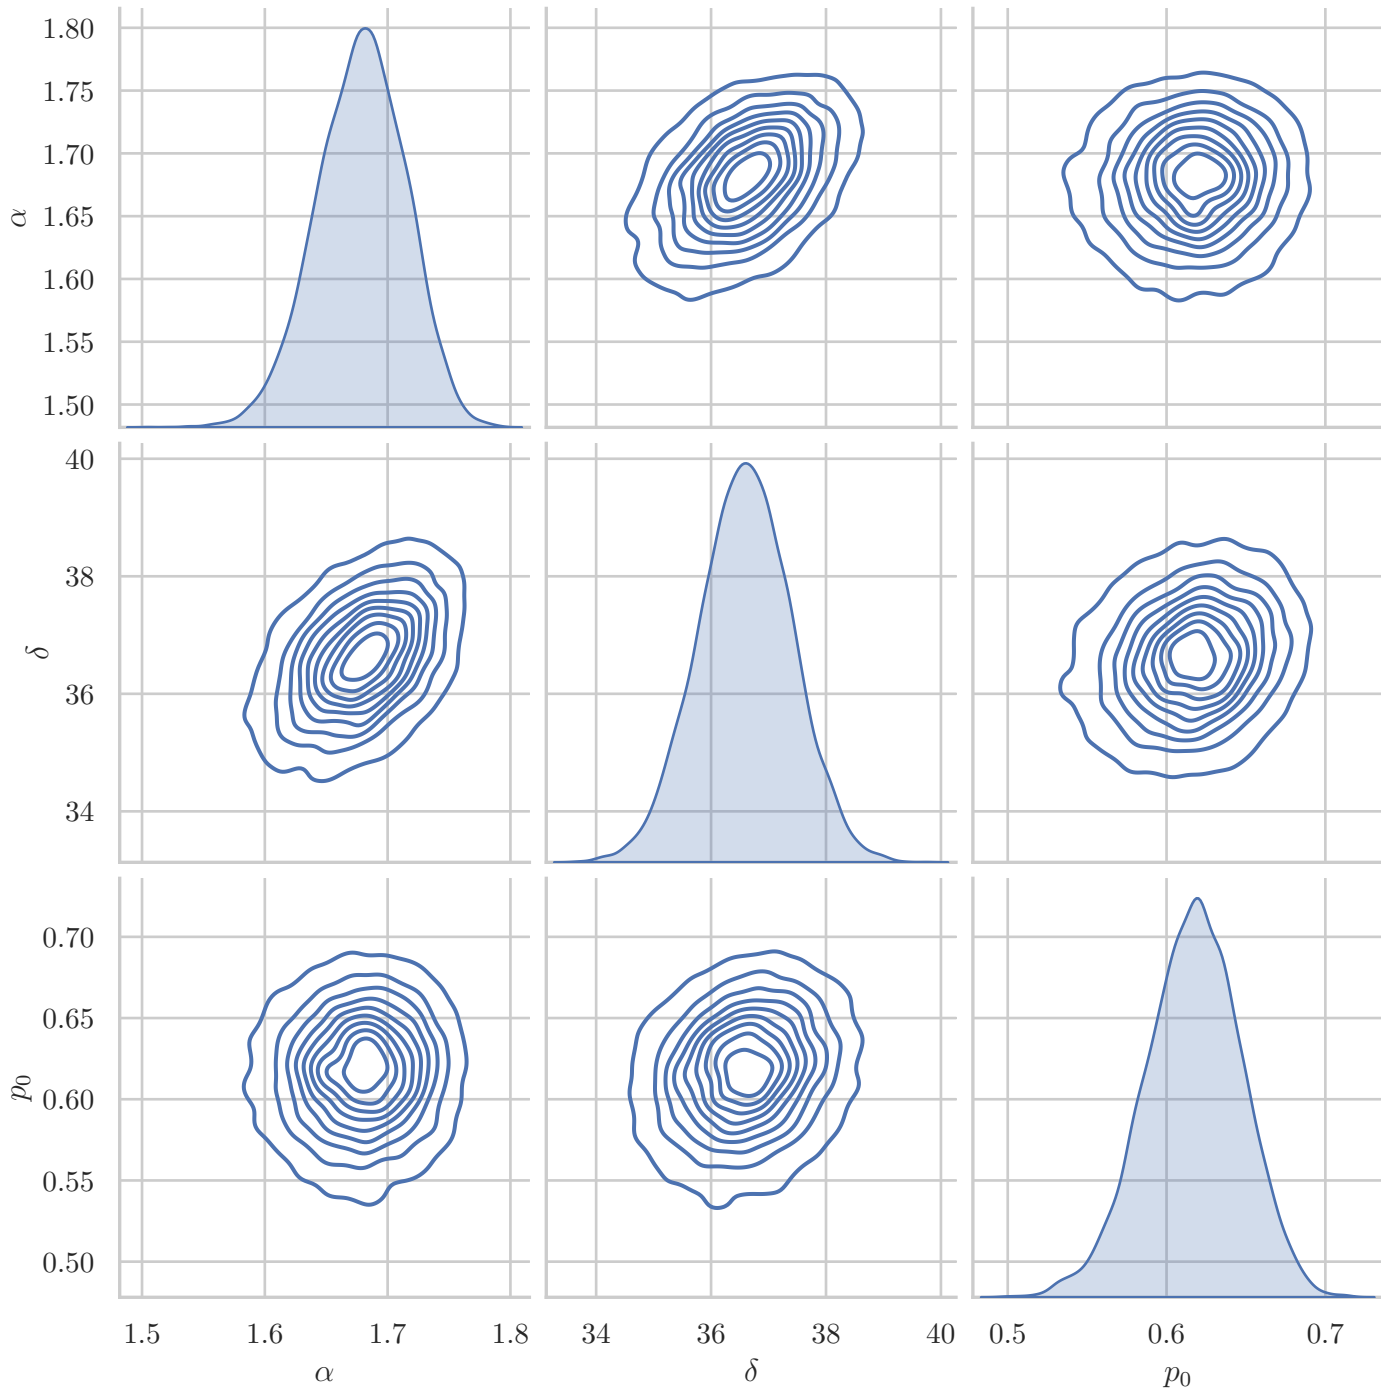

Supplement: supplementary_material [file pairplot_bsl_fcg_7.pdf › LSVI_NIPS/LSVI/experiments/syntheticLikelihood/output/pairplot_bsl_fcg_7.pdf]

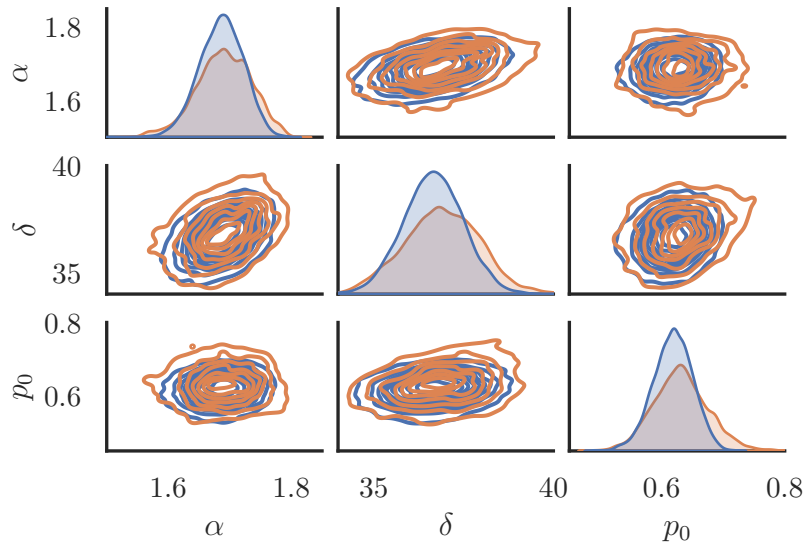

Supplement: supplementary_material [file pairplot_bsl_fcg_mcmc_concat-5.pdf › LSVI_NIPS/LSVI/experiments/syntheticLikelihood/output/pairplot_bsl_fcg_mcmc_concat-5.pdf]

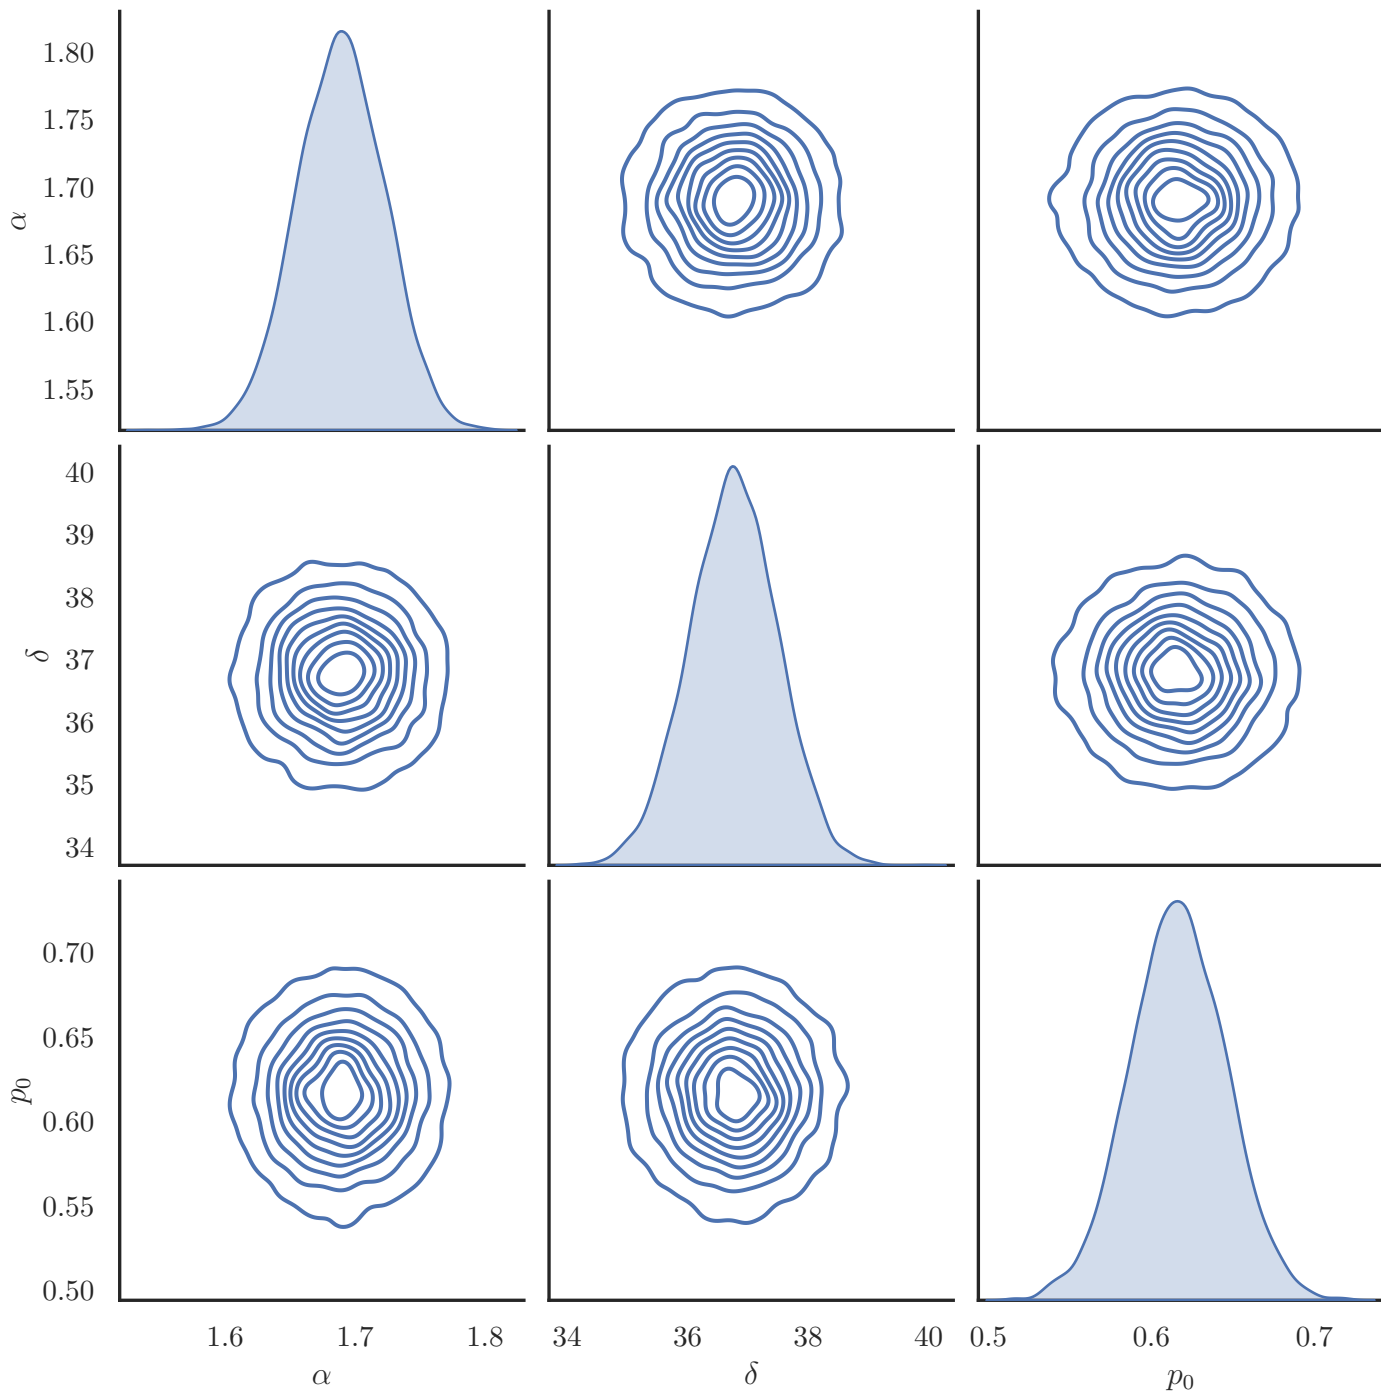

Supplement: supplementary_material [file pairplot_bsl_mft_1.pdf › LSVI_NIPS/LSVI/experiments/syntheticLikelihood/output/pairplot_bsl_mft_1.pdf]

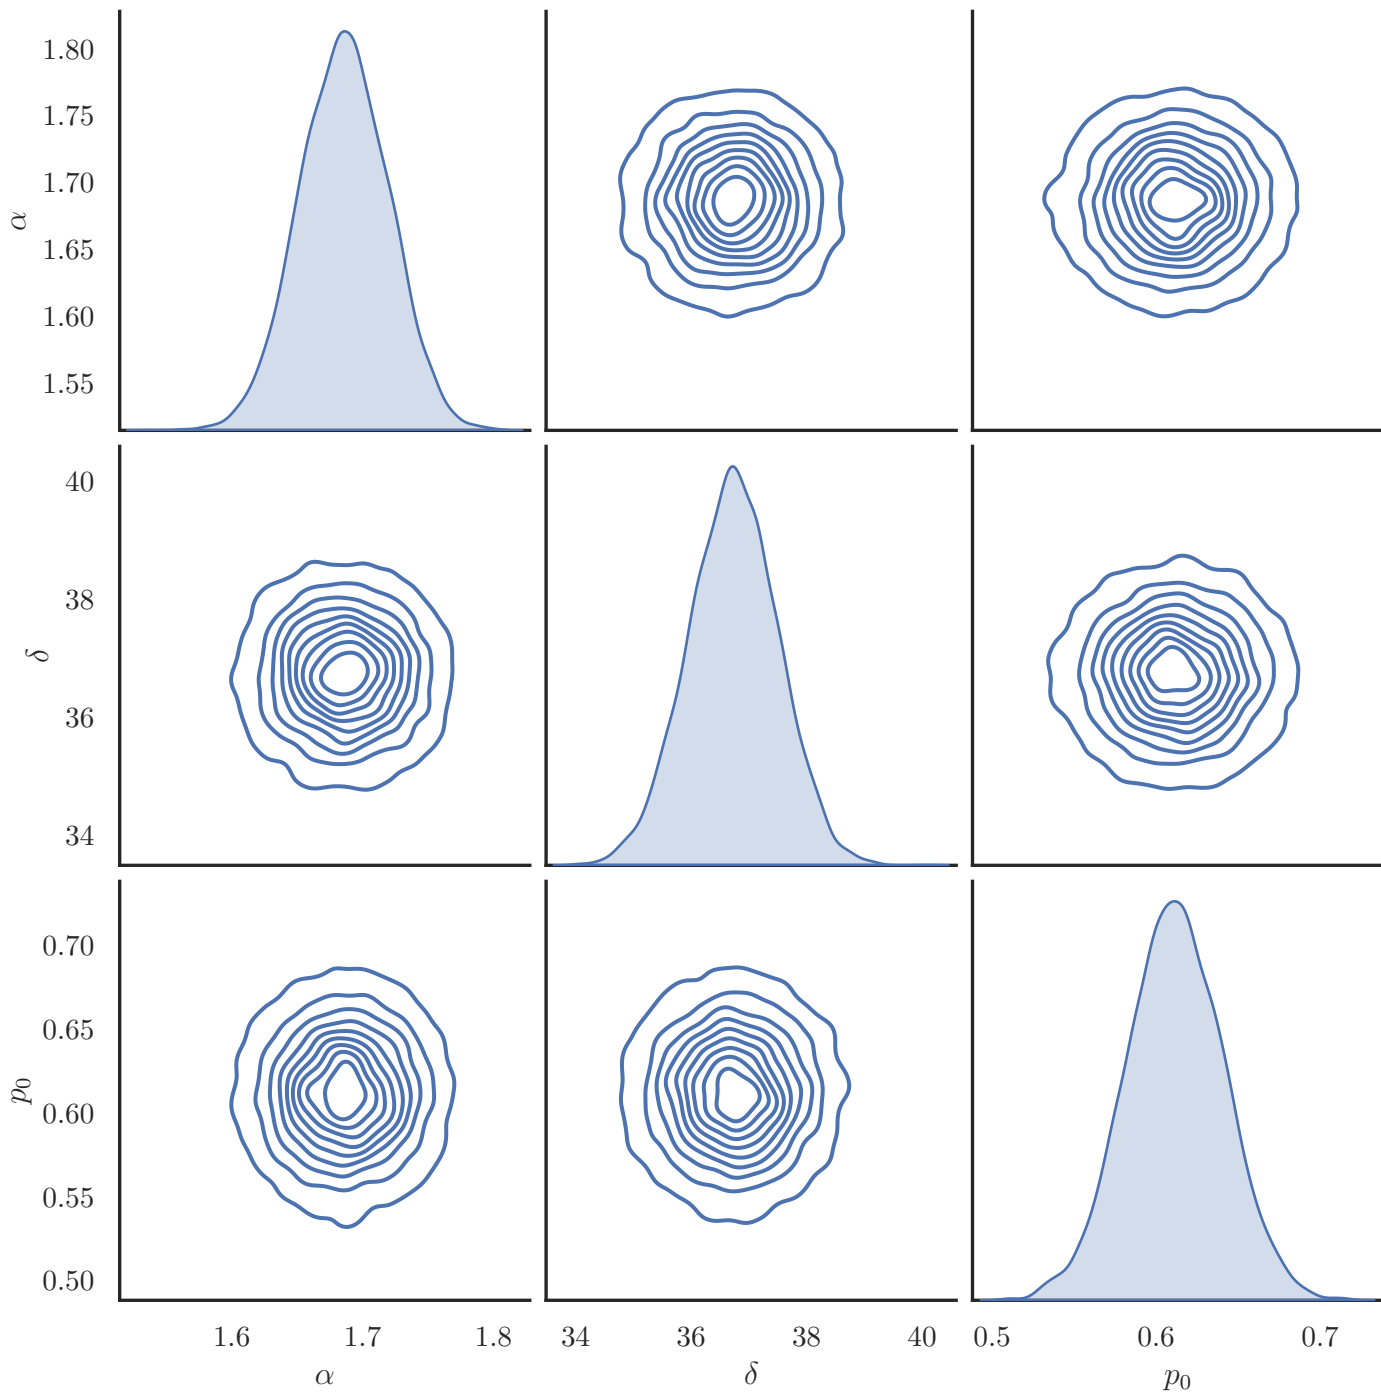

Supplement: supplementary_material [file pairplot_bsl_mft_10.pdf › LSVI_NIPS/LSVI/experiments/syntheticLikelihood/output/pairplot_bsl_mft_10.pdf]



Supplement: supplementary_material [file pairplot_bsl_mft_11.pdf › LSVI_NIPS/LSVI/experiments/syntheticLikelihood/output/pairplot_bsl_mft_11.pdf]

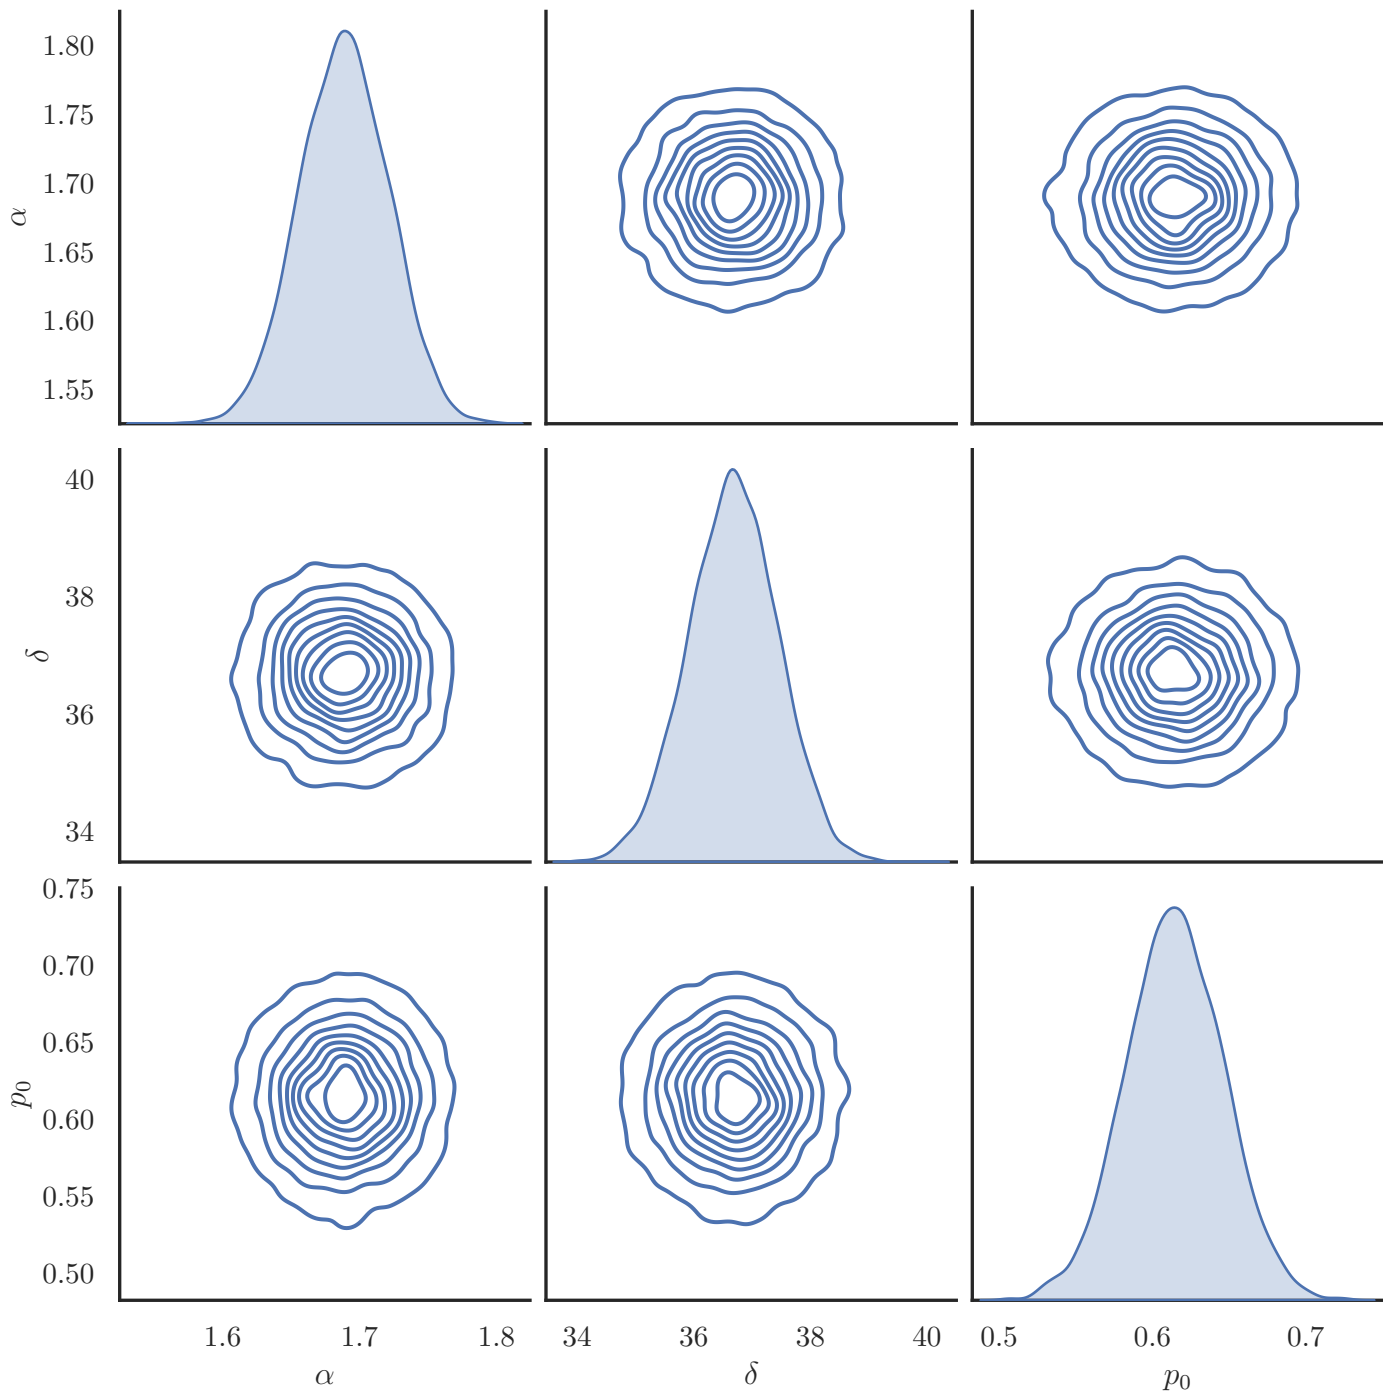

Supplement: supplementary_material [file pairplot_bsl_mft_4.pdf › LSVI_NIPS/LSVI/experiments/syntheticLikelihood/output/pairplot_bsl_mft_4.pdf]

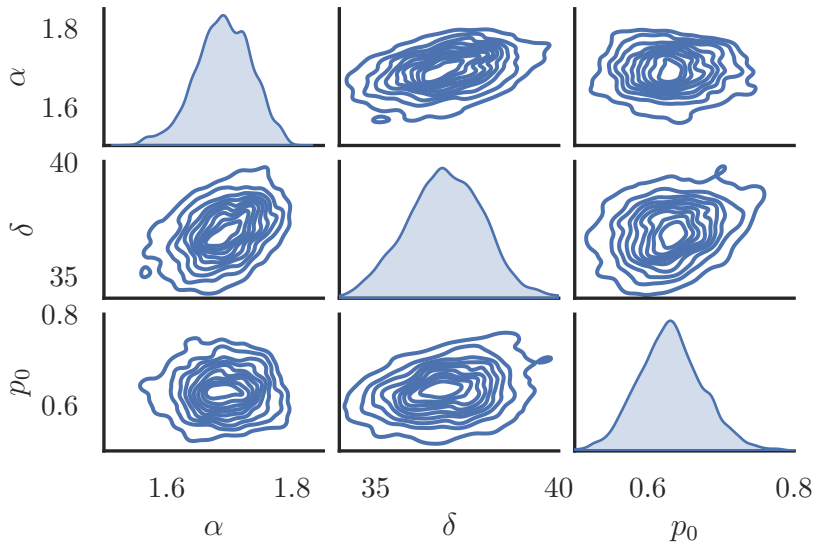

Supplement: supplementary_material [file pairplot_bsl_true_posterior_constant_sigma_9.pdf › LSVI_NIPS/LSVI/experiments/syntheticLikelihood/output/pairplot_bsl_true_posterior_constant_sigma_9.pdf]
